# Supplementary material for: Coronary Venous Pressure and Microvascular Hemodynamics in Patients With Microvascular Angina: A Randomized Clinical Trial
Source: PubMed Central journal article supplement (PMC10448373; doi:10.1001/jamacardio.2023.2566), 2023-08-23
Supplement: jamacardiol-e232566-s001.pdf [file jamacardiol-e232566-s001.pdf]

1 Clinical Investigation Plan

2

3

4 **Study Title: MACCUS: ModulAtion of Cardiac Coronary sinus hemodynamics to develop a**  
5 **new treatment for microvascUlar diseaSe. A single center, randomized study.**

6

7

8

9 Protocol acronym                      MACCUS

10

11

12

13 Clinical Study Reference

14 Number

NCT05034224

15

16

17 Version

1.0

18

19 Date

16/07/2020

20

21

22 Sponsor

*Universitätsmedizin Mainz*

23

24

25

26

27

28

29

*Zentrum für Kardiologie, Kardiologie I*

*Direktor: Univ-Prof. Dr. med. Thomas Münzel*

*Langenbeckstraße 1*

*55131 Mainz*

*Tel. (06131) 17 2829*

*Fax (06131) 17 6615*

30 Principal investigator:

Univ-Prof. Tommaso Gori, PhD

31

Universitätsmedizin Mainz

32

33

## 34 CLINICAL INVESTIGATION PLAN HISTORY

35

36

| Version | Date       | Main changes     |
|---------|------------|------------------|
| 1.0     | 16/07/2020 | First submission |
|         |            |                  |
|         |            |                  |
|         |            |                  |

37

38

39 **Responsibilities**

40

|                                                                                         |                                                                                                                                                                                            |
|-----------------------------------------------------------------------------------------|--------------------------------------------------------------------------------------------------------------------------------------------------------------------------------------------|
| <b>Coordinating Clinical Investigators / „Leiter der Klinischen Prüfung“ in Germany</b> | Univ-Prof. Tommaso Gori, Dott Med e Chir (Siena), PhD (Toronto)                                                                                                                            |
| <b>Sponsor</b>                                                                          | Universitätsmedizin Mainz, Zentrum für Kardiologie, Kardiologie I, Direktor: Univ-Prof. Dr. med. Thomas Münzel, Langenbeckstraße 1, 55131 Mainz, Tel. (06131) 17 2729, Fax (06131) 17 6615 |
| <b>CRO</b>                                                                              | Not applicable                                                                                                                                                                             |
| <b>Start up activities</b>                                                              | Not applicable                                                                                                                                                                             |
| <b>Steering Committee</b>                                                               | Not applicable                                                                                                                                                                             |
| <b>Trial Statistician</b>                                                               | Christian Ruckes, IZKS Universitätsmedizin Mainz                                                                                                                                           |
| <b>Responsible Data Manager</b>                                                         | Univ-Prof. Tommaso Gori, Dott Med e Chir (Siena), PhD (Toronto)                                                                                                                            |
| <b>Responsible for Vigilance and Regulatory Support</b>                                 | Not applicable                                                                                                                                                                             |
| <b>Other members of the study group</b>                                                 | Maximilian Olschewski<br>Dr. Helen Ullrich                                                                                                                                                 |

41

42

43 **Signatures**44 **Compliance Statement**

45 The studies will be conducted in accordance with the design and specific provisions of this  
 46 CIP, in accordance with the ethical principles that have their origin in the Declaration of  
 47 Helsinki, and that are consistent with Good Clinical Practice (GCP) and the applicable  
 48 regulatory requirements.

49 We, the undersigned, have read and approve the CIP specified above and agree on its content.

50

51

52

**Coordinating Clinical  
Investigators /  
„Leiter der Klinischen  
Prüfung“ in Germany**

*Prof. Tommaso Gori, Dott Med e Chir (Siena), PhD (Toronto)*

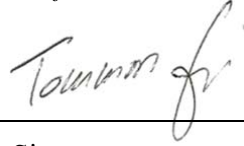

13.09.2020

---

Signature

Date

**Sponsor  
Director of the clinic**

*Prof. Dr. med. Thomas Münzel*



13.09.2020

---

Signature

Date

Universitätsmedizin Mainz, Zentrum für Kardiologie, Kardiologie I  
Direktor: Univ-Prof. Dr. med. Thomas Münzel

54 **Signature of the Principal Clinical Investigator**

Name Tommaso - Gori, MD, PhD

Institution Zentrum für Kardiologie, Kardiologie I

Street Langenbeckstr. 1

ZIP Code / City 55131 Mainz

Country DE

55

56

57 *I have read this protocol, appendices and amendment(s), if applicable, and agree to adhere to*  
58 *the requirements. I will provide copies of this protocol and all pertinent information to the*  
59 *study personnel under my supervision. I will discuss this material with them and ensure they*  
60 *are fully informed regarding the device and the conduct of the studies.*

61 *I will conduct the studies in accordance with the protocol, the Declaration of Helsinki, Good*  
62 *Clinical Practice guidelines as well as local regulations, and I accept respective revisions to*  
63 *the protocol approved by authorized personnel of the Sponsor and by regulatory authorities.*

64 *I agree to report every occurring Adverse Event and Device Deficiency according to the*  
65 *timelines and regulations indicated in the CIP.*

66

67

Mainz, 25<sup>th</sup> August 2020

City, Date

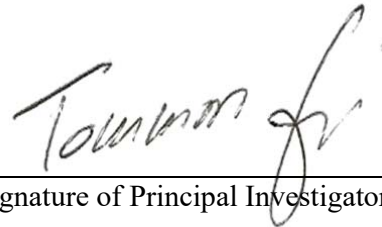

Signature of Principal Investigator

68

69

|    |          |                                                                                     |                                     |
|----|----------|-------------------------------------------------------------------------------------|-------------------------------------|
| 70 | <b>1</b> | <b>Table of Contents</b>                                                            |                                     |
| 71 |          | Responsibilities .....                                                              | 3                                   |
| 72 |          | Signatures .....                                                                    | 3                                   |
| 73 | 1        | Table of Contents .....                                                             | 6                                   |
| 74 | 2        | List of Abbreviations.....                                                          | 8                                   |
| 75 | 3        | Synopsis .....                                                                      | 10                                  |
| 76 | 4        | Background and Study Rationale.....                                                 | <b>Error! Bookmark not defined.</b> |
| 77 |          | <i>PROTOCOL RATIONALE</i> .....                                                     | 12                                  |
| 78 |          | <i>BACKGROUND</i> .....                                                             | 12                                  |
| 79 | 5        | Hypothesis.....                                                                     | 14                                  |
| 80 | 6        | Study design .....                                                                  | 14                                  |
| 81 | 7        | Trial Endpoints.....                                                                | 14                                  |
| 82 |          | <i>Primary endpoint</i> .....                                                       | 14                                  |
| 83 |          | <i>Secondary endpoints:</i> .....                                                   | 14                                  |
| 84 | 8        | Procedures.....                                                                     | 15                                  |
| 85 | 9        | Study population .....                                                              | 17                                  |
| 86 |          | <i>Inclusion criteria</i> .....                                                     | 17                                  |
| 87 |          | <i>Patients unable to understand the scope of the study/unable to consent</i> ..... | 17                                  |
| 88 | 10       | Other procedures .....                                                              | 18                                  |
| 89 |          | <i>Recruitment</i> .....                                                            | 18                                  |
| 90 |          | <i>Pre-interventional Procedures</i> .....                                          | 18                                  |
| 91 |          | <i>Randomization</i> .....                                                          | 18                                  |
| 92 |          | <i>Post-interventional procedures</i> .....                                         | 19                                  |
| 93 | 11       | Risks and benefits.....                                                             | 20                                  |

|     |                                                                      |    |
|-----|----------------------------------------------------------------------|----|
| 94  | <i>Risks</i> .....                                                   | 20 |
| 95  | <i>Benefits:</i> .....                                               | 20 |
| 96  | 12 Study insurance .....                                             | 20 |
| 97  | 13 Information sharing with the practitioner.....                    | 21 |
| 98  | 14 Data management.....                                              | 21 |
| 99  | 15 Monitoring.....                                                   | 21 |
| 100 | 16 Use of radiation .....                                            | 21 |
| 101 | 17 Statistical analysis .....                                        | 21 |
| 102 | <i>Power Calculation</i> .....                                       | 21 |
| 103 | <i>Statistical analysis of primary and secondary endpoints</i> ..... | 22 |
| 104 | 18 References .....                                                  | 22 |
| 105 | 19 Financing.....                                                    | 23 |
| 106 | 20 Publication Policy .....                                          | 23 |
| 107 |                                                                      |    |
| 108 |                                                                      |    |

109 **2 List of Abbreviations**

|               |                                                                                                                            |
|---------------|----------------------------------------------------------------------------------------------------------------------------|
| <b>ACS</b>    | Acute Coronary Syndrome                                                                                                    |
| <b>AE</b>     | Adverse Event                                                                                                              |
| <b>BMI</b>    | Body-Mass-Index                                                                                                            |
| <b>CABG</b>   | Coronary Artery Bypass Graft                                                                                               |
| <b>CAD</b>    | Coronary artery disease                                                                                                    |
| <b>CCI</b>    | Coordinating Clinical Investigator / Leiter der Klinischen Prüfung                                                         |
| <b>CCS</b>    | Canadian cardiovascular society                                                                                            |
| <b>CE</b>     | CE mark, a stylized "CE" (Conformité Européenne) placed on products to signify conformance with European Union regulations |
| <b>CFR</b>    | Coronary flow reserve                                                                                                      |
| <b>CIP</b>    | Clinical Investigation Plan                                                                                                |
| <b>CRO</b>    | Clinical Research Organization                                                                                             |
| <b>EC/MEC</b> | Ethics Committee/Medical Ethics Committee                                                                                  |
| <b>ECG</b>    | Electrocardiogram                                                                                                          |
| <b>FFR</b>    | Fractional flow reserve                                                                                                    |
| <b>GCP</b>    | Good Clinical Practice                                                                                                     |
| <b>FFR</b>    | Fractioned flow reserve                                                                                                    |
| <b>hrs</b>    | Hours                                                                                                                      |
| <b>IMR</b>    | Index of microvascular resistances                                                                                         |
| <b>INR</b>    | International normalized ratio                                                                                             |
| <b>ISO</b>    | International Organization for Standardization                                                                             |
| <b>LBBB</b>   | Left Bundle Branch Block                                                                                                   |
| <b>Pa</b>     | Pressure, aortic                                                                                                           |
| <b>Pd</b>     | Pressure, distal                                                                                                           |
| <b>PB-CFR</b> | Pressure-bound CFR                                                                                                         |
| <b>PCI</b>    | Percutaneous Coronary Intervention                                                                                         |
| <b>aPTT</b>   | Activated thromboplastin time                                                                                              |
| <b>RFR</b>    | Resting full-cycle flow ratio                                                                                              |
| <b>SAE</b>    | Serious Adverse Event                                                                                                      |
| <b>SC</b>     | Steering Committee                                                                                                         |
| <b>SD</b>     | Standard deviation                                                                                                         |
| <b>Tmn</b>    | Mean transit time                                                                                                          |



**URL**            upper reference limit

110

111

112

113

114

115

**3 Synopsis**

|                        |                                                                                                                                                                                                                                                                                                                                                                                                                                                                                                                                                                                                                                                   |
|------------------------|---------------------------------------------------------------------------------------------------------------------------------------------------------------------------------------------------------------------------------------------------------------------------------------------------------------------------------------------------------------------------------------------------------------------------------------------------------------------------------------------------------------------------------------------------------------------------------------------------------------------------------------------------|
| Title                  | <b>ModulAtion of Cardiac Coronary sinus hemodynamics to develop a new treatment for microvascUlar diseaSe.</b>                                                                                                                                                                                                                                                                                                                                                                                                                                                                                                                                    |
| Acronym                | MACCUS                                                                                                                                                                                                                                                                                                                                                                                                                                                                                                                                                                                                                                            |
| Type of study          | Randomized, single-center, controlled, cross-over interventional study. Coronary artery resistances will be measured at baseline and during temporary occlusion of the coronary sinus. All patients will have an indication for assessment of microvascular function as a prerequisite (and independently of) their participation in the study.                                                                                                                                                                                                                                                                                                   |
| Medical condition      | Coronary microvascular disease, refractory angina                                                                                                                                                                                                                                                                                                                                                                                                                                                                                                                                                                                                 |
| Study population       | Patients undergoing hemodynamic assessment of microvascular function during the rule-out of myocardial ischemia / angina.                                                                                                                                                                                                                                                                                                                                                                                                                                                                                                                         |
| Objective of the study | To determine the acute effect of an increase in coronary sinus pressure on microvascular resistances in patients with microvascular angina;                                                                                                                                                                                                                                                                                                                                                                                                                                                                                                       |
| Key inclusion criteria | Chronic coronary syndrome (including patients with anginal equivalents). Reversible ischemia on non-invasive testing, indication to cardiac catheterization; Indication to the assessment of microvascular function (note: patients will be asked for participation and consented prior to the first measurement of microvascular function, which will be conducted as per clinical indication; only those with evidence of pure or mixed microvascular disease (index of microvascular resistances (IMR)>25 will proceed into the study); Willingness to participate and ability to understand, read and sign the informed consent; age>18 years |
| Key exclusion criteria | Previous CABG with patent grafts to the left anterior descending coronary<br>Epicardial coronary disease (FFR <0.80 with evidence of a focal stenosis) in the left anterior descending territory<br>Severe valvular heart disease<br>Any cardiomyopathy; pulmonary or renal disease<br>Inability to provide informed consent<br>Any disease reducing life expectancy                                                                                                                                                                                                                                                                              |
| Endpoints              | Primary efficacy endpoint:<br>The primary endpoint is the Index of coronary microvascular resistances (IMR) in sham versus balloon condition.<br><br>Key secondary endpoint(s):<br>Physiological parameters (Pd/Pa, Tmn, CFR, RFR,                                                                                                                                                                                                                                                                                                                                                                                                                |

|                                                                       |                                                                                                                                                                                                                                                                                                                                                                                                                                                                                                                                                                                                                                                                                                                                                                                                                                                                                                                                                                                                                                                                                                                                                                                                                                                                                                                                                                                                                           |
|-----------------------------------------------------------------------|---------------------------------------------------------------------------------------------------------------------------------------------------------------------------------------------------------------------------------------------------------------------------------------------------------------------------------------------------------------------------------------------------------------------------------------------------------------------------------------------------------------------------------------------------------------------------------------------------------------------------------------------------------------------------------------------------------------------------------------------------------------------------------------------------------------------------------------------------------------------------------------------------------------------------------------------------------------------------------------------------------------------------------------------------------------------------------------------------------------------------------------------------------------------------------------------------------------------------------------------------------------------------------------------------------------------------------------------------------------------------------------------------------------------------|
|                                                                       | <p>RRR, see definitions below)</p> <p>Assessment of safety:<br/>Evidence of coronary ischemia, bleeding, stroke, embolization, perforation.</p>                                                                                                                                                                                                                                                                                                                                                                                                                                                                                                                                                                                                                                                                                                                                                                                                                                                                                                                                                                                                                                                                                                                                                                                                                                                                           |
| Risks and benefits<br>(without an expected difference between groups) | The hemodynamic measurements and accompanying examinations are on-label and applied according to clinical indication. The angioplasty balloon is expanded incompletely and at low pressure, so there is no relevant risk of vessel injury. Vascular access is performed using the femoral vein, the risks correspond to those of a routinely performed venous puncture.                                                                                                                                                                                                                                                                                                                                                                                                                                                                                                                                                                                                                                                                                                                                                                                                                                                                                                                                                                                                                                                   |
| Study Sites                                                           | Mainz                                                                                                                                                                                                                                                                                                                                                                                                                                                                                                                                                                                                                                                                                                                                                                                                                                                                                                                                                                                                                                                                                                                                                                                                                                                                                                                                                                                                                     |
| Patient Enrolment                                                     | up to 25                                                                                                                                                                                                                                                                                                                                                                                                                                                                                                                                                                                                                                                                                                                                                                                                                                                                                                                                                                                                                                                                                                                                                                                                                                                                                                                                                                                                                  |
| Patient Follow-Up                                                     | None                                                                                                                                                                                                                                                                                                                                                                                                                                                                                                                                                                                                                                                                                                                                                                                                                                                                                                                                                                                                                                                                                                                                                                                                                                                                                                                                                                                                                      |
| Concomitant Therapy                                                   | As per guidelines                                                                                                                                                                                                                                                                                                                                                                                                                                                                                                                                                                                                                                                                                                                                                                                                                                                                                                                                                                                                                                                                                                                                                                                                                                                                                                                                                                                                         |
| Timelines<br>(planned)                                                | First patient in: 09-2020<br>Last patient out: 06-2022                                                                                                                                                                                                                                                                                                                                                                                                                                                                                                                                                                                                                                                                                                                                                                                                                                                                                                                                                                                                                                                                                                                                                                                                                                                                                                                                                                    |
| Statistical Analysis                                                  | <p><u>Efficacy/Test accuracy:</u><br/>The index of microvascular resistance is a well validated, gold-standard method to assess the coronary microcirculation.</p> <p><u>Description of the primary efficacy/Test accuracy analysis and population:</u><br/>The primary analysis will be performed as within-subject-comparison of the primary outcome between each of the two groups (sham or balloon).</p> <p><u>Effect size assumed for estimation of sample size:</u><br/>We expect a difference of the balloon versus sham treatment of 9 units and a within-subjects standard deviation of 13 units. Therefore, the expected effect size is 0.69.</p> <p><u>Safety:</u><br/>The safety and efficacy of all devices has been previously shown in large clinical trials. The hemodynamic measurements and accompanying examinations are on-label and are used according to the clinical indication. There are no additional risks from participation to the study.</p> <p><u>Secondary endpoints (at rest and during hyperemia):</u><br/>FFR: fractional flow reserve (a gold standard for the assessment of epicardial coronaries)<br/>CRF: coronary flow reserve (a mixed index of macro- and microvascular hemodynamics)<br/>IMR: index of microvascular resistance (a gold standard for the assessment of coronary microcirculation)<br/>RRR: Resistance Reserve Ratio (a marker of microvascular reactivity)</p> |

|             |                                                                                                                                                                                                                              |
|-------------|------------------------------------------------------------------------------------------------------------------------------------------------------------------------------------------------------------------------------|
|             | CFR_norm: CFR normalized by FFR<br>CFI: collateral flow index<br>PB-CFR: Pressure bounded CFR: CFR estimated from resting & hyperemic pressure gradients<br>Pd, Pa: peripheral and aortic pressure<br>Tmn: mean transit time |
| Sample Size | To be assessed for eligibility (n = 300)<br>To be allocated to trial (up to n =25)<br>To be analysed (up to n =25)                                                                                                           |

117

118 *PROTOCOL SUMMARY*

119

120 The aim of this study is to test whether an increase in coronary sinus pressure leads to a  
121 change in coronary microvascular resistances in patients with angina pectoris and with an  
122 indication to measurement of microvascular function as per clinical guidelines.

123 All patients with a clinical indication for the assessment of microvascular function will be  
124 invited to participate and will sign the informed consent at least 24 hours before the study.  
125 Patients with an index of microvascular resistances >25 (i.e. evidence of microvascular  
126 dysfunction) will undergo study-specific procedures in the same session (i.e. no additional  
127 invasive procedure is required for the study).

128 Study-specific procedures include the repetition of the assessment of microvascular  
129 resistances without (sham condition) versus with coronary sinus occlusion (balloon).  
130 Coronary sinus occlusion will be achieved by inflating a balloon sized to ~70% of the  
131 diameter of the coronary sinus. Since the implantation of a coronary sinus reducer is a  
132 therapeutic option for this type of patients, also this procedure (inflation of an undersized  
133 balloon in the coronary sinus) provides clinically relevant information (sizing of the vessel,  
134 effect on microvascular resistances and feasibility of the intervention).

135 The primary goal of the study is:

- 136 - To study the effect of coronary sinus occlusion on microvascular resistances at rest  
137 and during hyperemia.

138 **4 Background and Study Rationale**

139

140 *BACKGROUND*

141 Microvascular angina still represents a major clinical challenge whose importance is  
142 acknowledged in the most recent chronic coronary syndromes guidelines<sup>1</sup>. In particular, there  
143 is a strong disagreement on its classification, on the several mechanisms behind its  
144 pathophysiology<sup>2</sup>, and the therapeutic alternatives available remain unsatisfactory.

145 Despite these uncertainties, there is a consensus that this condition is clinically relevant as it  
146 affects up to two-thirds of patients who suffer from stable angina and either have no epicardial  
147 coronary stenosis at angiography or have combined epicardial and microvascular disease<sup>3</sup>.

148 Microvascular angina caused by a dysfunctional microvascular bed cannot be treated by  
149 standard revascularization therapies and the pharmacological strategies (e.g. nitrates, ca-  
150 channel blockers, ranolazine) available also provide limited benefit. As a consequence, the old  
151 hypothesis of improving myocardial perfusion by diverting blood from the coronary venous  
152 system to an ischemic region (“venous retroperfusion”) has again gained attention during  
153 recent years. This therapy was proposed as early as 1953 and is based on the concept that an  
154 elevation in backward pressure in the coronary venous system provokes dilatation of the  
155 subendocardial arterioles, resulting in a relative reduction of vascular resistance in this area  
156 and a redistribution of blood flow to these ischemic subendocardial layers<sup>4</sup>. Numerous studies  
157 confirm the efficacy of this approach for the therapy of patients who have angina and are not  
158 candidates for “traditional” revascularization<sup>4</sup>.

159 **The study presented here aims to investigate the effect of an increase in coronary sinus**  
160 **pressure on microvascular function in the acute setting, a potentially new therapeutic**  
161 **concept.**

162  
163 Initial evidence from animal studies and a series of patients appears to support the hypothesis  
164 that coronary sinus occlusion (CSO) improves microvascular function: Ido et al.<sup>10</sup>  
165 demonstrated that coronary sinus occlusion lead to dilatation of the subendocardial arterioles,  
166 resulting in a significant reduction of vascular resistance in this area and a redistribution of  
167 blood flow to these ischemic subendocardial layers. In a small case series by Giannini et al.<sup>11</sup>,  
168 patients with microvascular angina showed a clinical improvement after coronary sinus  
169 occlusion, an effect similar to that shown in the randomized, sham-controlled trial COSIRA  
170<sup>12</sup>(improvement of 2 CCS angina classes in 35% of the patients). In the paper by de Maria et  
171 al<sup>13</sup>, percutaneous-intermittent CSO (PICSO) improved microvascular perfusion and  
172 resistances in patients with no reflow after ST-elevation myocardial infarction. Finally, we  
173 recently provided mechanistic evidence that CSO might improve microvascular function in a  
174 patient with evidence of severe microvascular dysfunction: in a recent publication (Gori T  
175 Eurointervention online), we described a case of a patient with microvascular angina that  
176 benefited from the implantation of the Reducer. This 61-year old patient with a history of  
177 insulin-dependent diabetes, hypertension, and multiple PCIs underwent implantation of a  
178 coronary sinus Reducer for chronic angina refractory to maximal therapy. His symptoms  
179 included a CCS III angina leading to 4 hospitalizations in the 6 months before Reducer  
180 implantation. In order to better understand the pathophysiology of his symptoms, a full  
181 hemodynamic assessment was performed. The fractional flow reserve (FFR) in the left  
182 anterior descending (LAD) was 0.87, witnessing the absence of epicardial disease. In contrast,  
183 the IMR was 63, documenting increased microvascular resistances as a mechanism of his  
184 symptoms. Based on this evidence, and on compassionate grounds, a coronary sinus Reducer  
185 was implanted. After implantation, the “trans-sinus” gradient was 3mmHg. FFR and resting  
186 full-cycle ratio (RFR) were unchanged (0.93 and 0.85), but IMR dropped to 37. Since  
187 implantation (currently 12 months follow-up at the time of this writing), the patient has never  
188 been admitted again to hospital and is symptom-free.

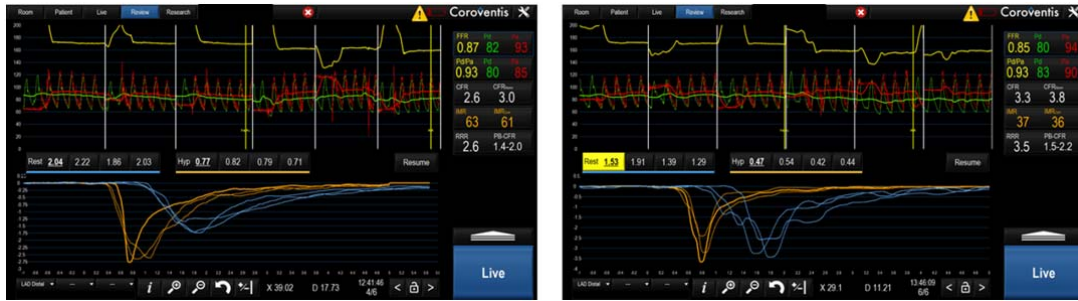

189

190

191 Although this is just preliminary data, they suggest that the redistribution of blood from the  
 192 subepicardial to the subendocardial space might be associated with a drop in total  
 193 microvascular resistances and therefore relief of symptoms.

194

## 195 5 Hypothesis

196 The hypothesis of the study is that occlusion of the coronary sinus will be associated with a  
 197 decrease in the index of microvascular resistances.

## 198 6 Study design

199 The study is a single-center, cross-over sham controlled randomized trial to investigate the  
 200 effect of coronary sinus occlusion on microvascular resistances.

201

## 202 7 Trial Endpoints

203 The primary analysis will be on the per-protocol principle (i.e. including all patients who are  
 204 not protocol violators). A separate analysis will be performed on an intention-to-treat basis  
 205 (i.e. all randomized patients randomized to a treatment arm).

206

### 207 *Primary endpoint*

208 1. Index of coronary microvascular resistances (IMR) in sham versus balloon condition.

209

### 210 *Key Secondary endpoints:*

#### 211 *changes in physiological parameters*

- 212 1. RFR (resting flow ratio);
- 213 2. FFR (fractional flow reserve);
- 214 3. Tmn (mean transit time);
- 215 4. Pa and Pd at rest and during hyperemia (aortic and coronary pressure);
- 216 5. Hyperemic Tmn;
- 217 6. RRR: Resistance Reserve Ratio (a marker of microvascular reactivity);

- 218 7. CFR: coronary flow reserve;  
219 8. CFR\_norm: CFR normalized by FFR;  
220 9. PB-CFR: Pressure bounded;

221 **Note: all these parameters are assessed during an FFR/IMR measurement as clinically**  
222 **indicated in this patient population and do not require additional procedures or imply**  
223 **additional risks.**

224 *Assessment of safety:*

225 Evidence of coronary ischemia, bleeding, stroke, embolization, perforation.

226

## 227 8 Procedures

228

### 229 *Hemodynamic measurements*

230 Coronary angiography and pressure wire assessments of coronary stenoses will be conducted  
231 as per clinical indication using standard methods. This assessment is commonly performed in  
232 the diagnostic algorithm of patients with chronic coronary syndromes without coronary  
233 stenoses. In this study, only patients in whom these assessments are planned will be included,  
234 such that all methods are used as clinically indicated as part of the normal routine.

235

236 As per standard procedures, intracoronary nitrates will be administered before each  
237 measurement when blood pressure is above 100mmHg systolic. Pressure wire normalization  
238 will be performed at the coronary ostia before each measurement and the presence of drift will  
239 be checked at each measurement. The distal position (constant across measurements) of the  
240 pressure wire will be documented fluoroscopically.

241

### 242 *Study Procedures*

243 Patients enrolled in the study will undergo these procedures as clinically indicated:

244

245 - Microvascular assessment will be performed in the left anterior descending coronary artery  
246 using the wire-based thermodilution method. This assessment of coronary hemodynamics will  
247 be performed as clinically indicated, according to guideline recommendations.

248

249 - Patients with FFR<0.80 and a focal stenosis (i.e. patients who can be treated with stent  
250 implantation) and/or patients with IMR<25 (i.e. without microvascular dysfunction) will be  
251 excluded from the study

252 - A 7-9mm balloon (sized to 70% of the coronary sinus) will be advanced in the coronary  
253 sinus, with access through the femoral vein. Microvascular function measurements will be  
254 made twice (in a random, cross-over design) during incomplete balloon occlusion (“balloon”)  
255 and with the deflated balloon in the right atrium (“sham”). The inflation of the balloon is a  
256 study-specific procedure. However, this procedure provides the following information that is  
257 important for the treatment of the patient:

258

- 259 1. Whether the IMR drops during coronary sinus occlusion. If this is the case (as in the  
260 patient described above), implantation of a coronary sinus reducer is indicated as it  
261 would be expected to result in the reduction of angina symptoms. If the inflation of the

- 262 balloon does not lead to a drop in IMR, then a coronary sinus reducer should not be  
 263 implanted.
- 264 2. In case implantation of a coronary sinus reducer is planned, the balloon allows sizing  
 265 of the coronary sinus. This increases the safety of the implantation, since the most  
 266 common complication during sinus reducer implantation is undersizing (resulting in  
 267 device embolism) or oversizing (resulting in sinus venosus rupture).
- 268
- 269

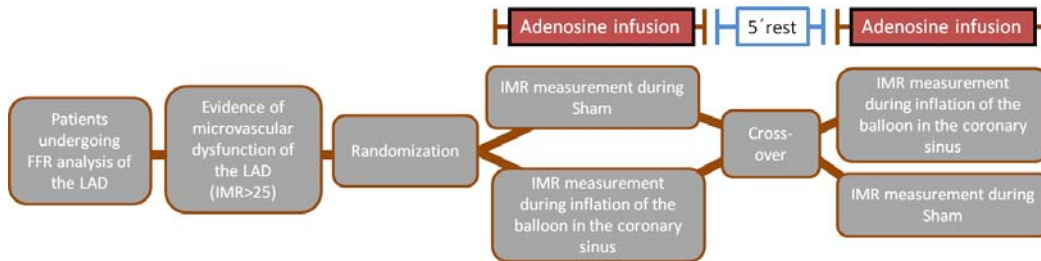

270

### 271 *Hemodynamic recordings*

272 Pressure wire recordings will be performed using the 0.014-inch pressure wire (Pressure Wire  
 273 X, Abbott Vascular, St Clara, USA). Analysis will be performed offline using the Coroflow  
 274 software (Coroventis Research AB Uppsala, Sweden).

275 For FFR measurements, the pressure wire will be advanced distal into the left anterior  
 276 descending coronary artery (LAD). The pressure gradient between catheter (Pa, aortic  
 277 pressure) and distal (wire-measured) pressure (Pd, pressure distal) will be assessed at rest and  
 278 during adenosine-induced hyperemia (140microgr/kg/min i.v., papaverine 14mg i.c. in case of  
 279 asthma. If the hyperemic Pd/Pa ratio (FFR, fractional flow reserve) is <0.80, a pull-back  
 280 recording will be performed to look for focal stenoses.

281

282 During hyperemia, three boli of saline will be injected through the guiding catheter to assess  
 283 parameters of microvascular function. All files will be coded and extracted for study purposes  
 284 by blinded staff at the end of the study.

285

286

287

## 288 **9 Safety:**

289

### 290 *Risk associated with participation in the study*

291 All measurements (including hemodynamic measurements) are applied as clinically indicated  
 292 and according to CE certificate and the instruction for use. The intervention applied in the  
 293 study is limited to the repetition of the measurement of coronary physiology and the  
 294 expansion of the angioplasty balloon as described above. Vascular access is performed using  
 295 the femoral vein; the risks correspond to those of a routinely performed venous puncture. The  
 296 measurement might have clinical relevance, since “responders” would be expected to profit  
 297 more from the sinus reducer. Measurements do not require X-Rays per se. The expansion of  
 298 the balloon is incomplete (only 70% of the vessel diameter) and performed using low pressure  
 299 (2-4ATM). The risk of trauma is thereby minimal.



300 Therapies will be based on evidence-based guideline recommendation. Thus, it is not to be  
301 expected that the participation in the study will lead to unneeded or harmful therapeutic  
302 interventions.

## 303 **9 Study population**

304 The study will be conducted in patients with chronic coronary syndrome (including patients  
305 with anginal equivalents) and reversible ischemia on non-invasive testing. In the case of  
306 therapy-refractory symptoms, the indication for the implantation of a coronary sinus reducer  
307 was already clinically established in advance. There must be an indication for cardiac  
308 revascularization and an evidence of pure or mixed microvascular disease (index of  
309 microvascular resistances (IMR>25). FFR and the further haemodynamic measurements are  
310 performed routinely in our laboratory.

### 311 *Inclusion criteria*

312 Patients must meet ALL of the inclusion criteria:

313

314 Chronic coronary syndrome (including patients with anginal equivalents);

315 Reversible ischemia on non-invasive testing, indication to cardiac catheterization;

316 Indication to the assessment of microvascular function (note: patients will be asked for  
317 participation and consented prior to the first measurement of microvascular function, which  
318 will be conducted as per clinical indication; only those with evidence of pure or mixed  
319 microvascular disease (index of microvascular resistances IMR>25 will proceed into the  
320 study);

321 Willingness to participate and ability to understand, read and sign the informed consent;

322 Age>18 years

323

### 324 *Exclusion criteria*

325 Patients will be excluded from eligibility for study enrollment if ANY of the following  
326 criteria applies to the patient:

327

328 Previous CABG with patent grafts to the left anterior descending coronary artery

329 Epicardial coronary disease (FFR <0.80 with evidence of a focal stenosis) in the left anterior  
330 descending territory

331 Second and third degree atrioventricular block

332 Severe valvular heart disease

333 Any cardiomyopathy; pulmonary or renal disease

334 Inability to provide informed consent

335 Any disease reducing life expectancy

### 336 *Patients unable to understand the scope of the study/unable to consent*

337 Patients unable to understand the scope of the study are classified as not able to give informed  
338 consent and are excluded for eligibility for study enrollment.

339 Likewise, patients unable to consent, e.g. for a neurological damage, are treated as not being  
340 able to give informed consent and are excluded for eligibility for study enrollment.

341 **10 Other procedures**

342 *Recruitment*

343 Patients will be enrolled among those treated at Zentrum für Kardiologie, Kardiologie 1 of the  
344 Universitätsmedizin Mainz.

345

346 *Patients*

347 The decision to perform the hemodynamic assessment of the lesion will be taken before, and  
348 independently of, the participation of the patient in the study.

349 Consent will be obtained by study physicians before beginning of the procedure.

350 It is not planned to recruit patients who are not already in medical treatment in the center of  
351 cardiology of the university hospital Mainz and, therefore, it is not planned to create any  
352 recruiting material, e.g. for promotion of the study.

353

354 *Pre-interventional Procedures*

355 Per standard clinical practice, the following baseline procedures will be performed prior to  
356 enrolment:

- 357 – Medical history and physical examination, including (among others) pulses, blood  
358 pressure, height and weight (body mass index; BMI).
- 359 – 12-lead electrocardiogram (ECG).
- 360 – Screening laboratory tests: white blood cell count, hemoglobin, hematocrit, platelet  
361 count, serum creatinine, electrolytes, activated partial thromboplastin time (aPTT),  
362 international normalized ratio (INR)
- 363 – A pregnancy test will be performed in females of childbearing potential.
- 364 – transthoracic echocardiography

365

366 *Randomization*

367 Randomization will be performed after informed consent and if all inclusion criteria and  
368 no exclusion criteria are met.

369 Patients will be randomized 1:1 to one of the two study arms.

370 Randomization will be done by using a computer-generated random sequence  
371 (Medcalc, Mariakerke, BE).

372

373 *Flow-chart*

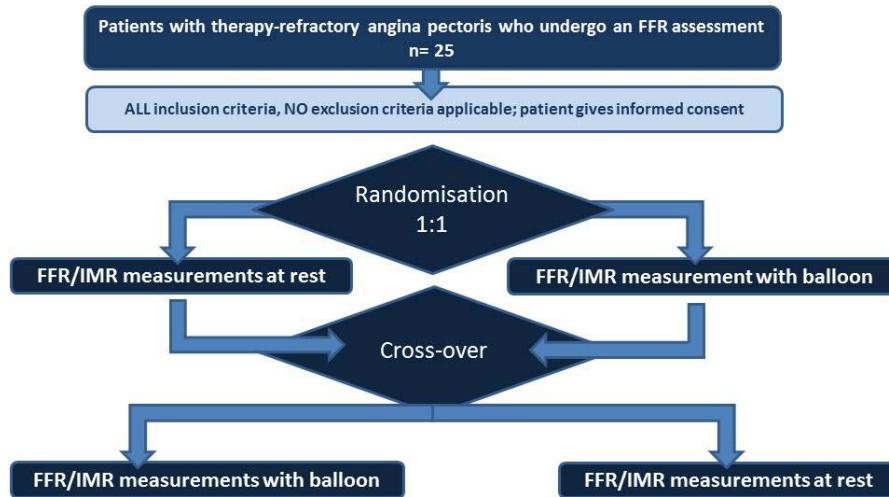

374

375

376

377 **Important note:**

378 The inflation of the balloon in the coronary sinus is a study-specific procedure, but it provides  
 379 information (feasibility of coronary sinus cannulation/sizing/effect of coronary sinus  
 380 occlusion on microvascular resistances) which is important for the treatment of the patient  
 381 (i.e. whether implantation of a sinus reducer is indicated). All procedures are conducted based  
 382 on the clinical indication, using CE-marked devices, and according to universally accepted  
 383 standards.

384

385 *Post-interventional procedures*

386 After intervention, patients will be treated according to guidelines by the responsible doctor as  
 387 per standard practice.

388 The medication treatment after intervention will be selected according to current guidelines  
 389 and depending on indication of coronary intervention and severity of disease. Until discharge,  
 390 patients will be treated according to routine practice, incorporating patients' individual  
 391 comorbidities.

392 In case additional an (staged) revascularization is deemed necessary at the time of  
 393 randomization, it can be performed during index hospitalization or later and patients should  
 394 be treated according to current guidelines.

395

396 **11 Risks and benefits**

397 Risks are linked with any intracoronary procedures and it is not expected that participation in  
398 the study will affect them. Access to the coronary sinus is performed through the femoral  
399 vein, which will be punctured as part of the study. The risks are similar to those of venous  
400 vessel puncture and are considered to be relatively low. The angioplasty balloon is expanded  
401 incompletely and at low pressure, so there is no relevant risk of vessel injury.

402

403 *Risks*

404 Risks linked with any intracoronary procedure:

405 Death, aneurysm, pseudoaneurysm, or arteriovenous fistula (AVF), stent deformation,  
406 collapse, or fracture, Emergency surgery: peripheral vascular or coronary bypass,  
407 stroke/transient ischemic attack (TIA), cardiac tamponade, coronary artery occlusion,  
408 perforation, rupture, or dissection, pericarditis, embolism (air, tissue, device, or thrombus),  
409 thrombosis (acute, subacute, late, or very late), incomplete stent apposition, myocardial  
410 infarction (MI), restenosis of the stented artery, arrhythmias, hemorrhage requiring  
411 transfusion, shock/pulmonary edema, coronary artery spasm, abrupt vessel closure,  
412 hypotension/hypertension, allergic reaction (to contrast, antiplatelet therapy, stent system—  
413 material, drug, or polymer coating), peripheral ischemia/peripheral nerve injury, infection or  
414 fever, unstable angina, access site pain, hematoma, or haemorrhage, balloon rupture, stent  
415 migration, failure to deliver the stent, stent misplacement.

416

417 Risks linked with venous catheterization:

418 Bleeding, hematomas, aneurysms, pseudoaneurysms, fistulas, perforations, thromboses,  
419 embolisms (air, tissue, device, or thrombus), skin/tissue and nerve damage, pain, discomfort,  
420 infections, allergic reactions

421

422 Risks linked with radiation:

423 Skin reaction

424 *Benefits:*

425 There is no benefit for the individual patients participating in the study.

426 **12 Study insurance**

427 Since all procedures (except for randomization) are clinically indicated and acknowledged in  
428 the current literature, a study insurance is not planned.

### 429 **13 Information sharing with the practitioner**

430 Since all procedures belong to clinical standards, is not planned to share information  
431 regarding the (non-existent) additional risks/implications connect to the participation in the  
432 study with the practitioner. A study ID will not be given out after enrollment into the study.

### 433 **14 Data management**

434 Patient data will be pseudonymized and collected by the study team.

435 Pseudonymized patient data will be stored digitally on an external hard-drive not connected to  
436 the clinical intranet and only accessible to the members of the study team. After ten years of  
437 storage, data will be destroyed.

438 It is not intended to give study participants' data to a third party.

439 All data will be analysed after the last patient is discharged from index hospitalization. No  
440 interim analysis is intended. However, a Data Safety Monitoring Board consisting of two  
441 physicians not affiliated with the study will monitor the safety of the subjects throughout the  
442 study.

443 In case a study participant withdraws consent after having his data collected from him, the  
444 patient's data will be anonymized.

### 445 **15 Monitoring**

446 External Monitoring is not planned.

447 The study is not powered to detect differences in clinical events. Events will be however  
448 collected and adjudicated by consensus of two cardiologists blinded to the allocation group as  
449 an additional procedure to monitor and guarantee the safety of the patients.

### 450 **16 Use of radiation**

451 There is no use of radiation for research purposes and outside the clinical routine. According  
452 to StrlSchV and RöV, or only according to the justifying indication of a competent physician  
453 following §80 StrlSchV and §23 RöV, no additional application is necessary. The patient  
454 exposed to radiation would receive the same radiation (type, duration, intensity) as if he or she  
455 was not a participant of the study. (Signed statement attached).

### 456 **17 Statistical analysis**

457 Statistical analysis will be performed with Medcalc (Mariakerk, Belgium) and SPSS.

#### 458 *Power Calculation*

459 The study is powered for the primary efficacy endpoint IMR (balloon versus sham). In the  
460 OxAMI-PICSO study<sup>13</sup>, PICSO reduced the IMR in patients with no reflow after ST-  
461 elevation myocardial infarction from 45 [22-51] to 25[19-36]. In unselected coronary artery  
462 disease patients, Mangiacapra et al[27] reported a decrease in IMR from 27±11 to 19±9 after  
463 intracoronary enalaprilat; Suda et al reported a decrease in IMR from ~28[21-35] to ~19[17-

464 23] ( $P < 0.0001$ , median decrease  $\sim 35\%$ ) in response to fasudil[28]. Luo[29] reported baseline  
465 IMR of 33 units in patients with microvascular dysfunction (i.e. our expected population),  
466 with a baseline SD of 7.6 units. When assuming a baseline IMR of 33 and conservatively  
467 using the pooled baseline SD of IMR 13 units of both treatment groups from Mangiacapra,  
468 and assuming a similar effect as that observed in the papers by Mangiacapra and Suda, this  
469 will result in an effect size of  $\sim 0.69$  ( $\sim 9/13$ ). With this effect size, a two-sided one-sample t-  
470 test and a power of 80%, 19 patients are needed. To allow for 25% missing values for patients  
471 with missing Pd, Tmn or Pv values either during sham or balloon inflation (“IMR not  
472 measureable”), up to 6 additional patients will be included in case of incomplete data  
473 collection.

#### 474 *Statistical analysis*

475 The index of microvascular resistance will be calculated as mean transit time (Tmn) x (distal  
476 arterial minus coronary sinus venous blood pressure (Pd-Pv)). The primary analysis will be  
477 done for the IMR measurement. The primary hypothesis is  $H_0: \mu_{Exp} = \mu_{Sham}$ , versus  $H_1:$   
478  $\mu_{Exp} \neq \mu_{Sham}$ , where  $\mu_{Exp}$  and  $\mu_{Sham}$  are the expected values of the IMR with  
479 experimental intervention and sham intervention respectively. The primary analysis will be  
480 performed as within-subject comparison of the primary parameter. Statistical tests and effect  
481 estimates will be calculated using a linear mixed regression model with a patient random  
482 intercept, condition and period as well as their interaction as fixed factors and age and sex as  
483 covariates. The condition by period interaction is expected to be insignificant because the  
484 balloon from the experimental intervention will produce a transient increase in coronary sinus  
485 pressure which will normalize upon deflation and thus not generate any carryover effect. The  
486 primary comparison will be performed at a two-sided significance level of  $\alpha = 0.05$ .  
487 Descriptive statistics will also be provided, secondary endpoints will be analyzed  
488 using Wilcoxon tests. No interim analysis is planned for this small cross-over study. Primary  
489 and secondary analyses will be performed in the ITT (intention to treat) population  
490 comprising all randomized patients. Analyses will be repeated in the per protocol population  
491 as sensitivity analysis comprising all patients without an a priori defined protocol violation.  
492 Bias is minimized by randomized sequence allocation based on a randomization list. The  
493 randomization ratio of the treatment sequences will be 1:1 without any stratification factors.  
494 Randomization with permuted blocks will be applied. The randomization list will be kept in  
495 safe and confidential custody. Randomization will be used within this trial allowing  
496 investigators to randomize patients via the eCRF. Role specific access rights and the need to  
497 confirm all details necessary for stratified randomization are incorporated within the process  
498 and will reduce the risk of misuse and unintended randomizations

#### 499 **18 References**

- 500 1. Knuuti J, Wijns W, Saraste A, Capodanno D, Barbato E, Funck-Brentano C, Prescott E, Storey  
501 RF, Deaton C, Cuisset T, Agewall S, Dickstein K, Edvardsen T, Escaned J, Gersh BJ, Svitil P, Gilard M,  
502 Hasdai D, Hatala R, Mahfoud F, Masip J, Muneretto C, Valgimigli M, Achenbach S, Bax JJ and Group  
503 ESCSD. 2019 ESC Guidelines for the diagnosis and management of chronic coronary syndromes. *Eur*  
504 *Heart J*. 2020;41:407-477.
- 505 2. Suzuki H. Different definition of microvascular angina. *Eur J Clin Invest*. 2015;45:1360-6.
- 506 3. Villano A, Lanza GA and Crea F. Microvascular angina: prevalence, pathophysiology and  
507 therapy. *J Cardiovasc Med (Hagerstown)*. 2018;19 Suppl 1:e36-e39.

- 508 4. Königstein M, Giannini F and Banai S. The Reducer device in patients with angina pectoris:  
509 mechanisms, indications, and perspectives. *Eur Heart J*. 2018;39:925-933.
- 510 5. Verheye S, Jolicoeur EM, Behan MW, Pettersson T, Sainsbury P, Hill J, Vrolix M, Agostoni P,  
511 Engstrom T, Labinaz M, de Silva R, Schwartz M, Meyten N, Uren NG, Doucet S, Tanguay JF, Lindsay S,  
512 Henry TD, White CJ, Edelman ER and Banai S. Efficacy of a device to narrow the coronary sinus in  
513 refractory angina. *N Engl J Med*. 2015;372:519-27.
- 514 6. Königstein M, Bazan S, Revivo M and Banai S. Coronary Sinus Reducer implantation improves  
515 symptoms, ischaemia and physical capacity in patients with refractory angina unsuitable for  
516 myocardial revascularisation: a single-centre experience. *EuroIntervention*. 2018;14:e452-e458.
- 517 7. Königstein M, Meyten N, Verheye S, Schwartz M and Banai S. The Coronary Sinus Reducer  
518 improves angina and ischaemia by redistribution of blood from non-ischaemic to ischaemic  
519 myocardium. *EuroIntervention*. 2015;11:728.
- 520 8. Königstein M, Shofti R, Schwartz M and Banai S. Coronary sinus reducer for the treatment of  
521 chronic refractory angina pectoris-results of the preclinical safety and feasibility study. *Catheter*  
522 *Cardiovasc Interv*. 2018;92:1274-1282.
- 523 9. Stoller M, Traupe T, Khattab AA, de Marchi SF, Steck H and Seiler C. Effects of coronary sinus  
524 occlusion on myocardial ischaemia in humans: role of coronary collateral function. *Heart*.  
525 2013;99:548-55.
- 526 10. Ido A, Hasebe N, Matsuhashi H and Kikuchi K. Coronary sinus occlusion enhances coronary  
527 collateral flow and reduces subendocardial ischemia. *Am J Physiol Heart Circ Physiol*.  
528 2001;280:H1361-7.
- 529 11. Giannini F, Baldetti L, Ielasi A, Ruparella N, Ponticelli F, Latib A, Mitomo S, Esposito A,  
530 Palmisano A, Chieffo A and Colombo A. First Experience With the Coronary Sinus Reducer System for  
531 the Management of Refractory Angina in Patients Without Obstructive Coronary Artery Disease. *JACC*  
532 *Cardiovasc Interv*. 2017;10:1901-1903.
- 533 12. Jolicoeur EM, Banai S, Henry TD, Schwartz M, Doucet S, White CJ, Edelman E and Verheye S.  
534 A phase II, sham-controlled, double-blinded study testing the safety and efficacy of the coronary  
535 sinus reducer in patients with refractory angina: study protocol for a randomized controlled trial.  
536 *Trials*. 2013;14:46.
- 537 13. De Maria GL, Alkhalil M, Borlotti A, Wolfrum M, Gaughran L, Dall'Armellina E, Langrish JP,  
538 Lucking AJ, Choudhury RP, Kharbada RK, Channon KM and Banning AP. Index of microcirculatory  
539 resistance-guided therapy with pressure-controlled intermittent coronary sinus occlusion improves  
540 coronary microvascular function and reduces infarct size in patients with ST-elevation myocardial  
541 infarction: the Oxford Acute Myocardial Infarction - Pressure-controlled Intermittent Coronary Sinus  
542 Occlusion study (OxAMI-PICSO study). *EuroIntervention*. 2018;14:e352-e359.
- 543 14. Lehmann EL. Nonparametrics : Statistical Methods Based on Ranks, Revised.: Pearson; 1998:  
544 pages 76-81.

545

## 546 **19 Financing**

547 The study will be financed by own means of the center of cardiology of the university hospital  
548 Mainz (=Sponsor) and means of the W3-Professorship of Translational myocardial and  
549 cardiovascular function. No third-party funds are planned.

## 550 **20 Publication Policy**

551 In accordance with the WMA Declaration of Helsinki - Ethical Principles for Medical  
552 Research Involving Human Subjects, researchers, authors, sponsors, editors and publishers all  
553 have ethical obligations with regard to the publication and dissemination of the results of

554 research. Researchers have a duty to make publicly available the results of their research on  
555 human subjects and are accountable for the completeness and accuracy of their reports. All  
556 parties should adhere to accepted guidelines for ethical reporting. Negative and inconclusive  
557 as well as positive results must be published or otherwise made publicly available. Sources of  
558 funding, institutional affiliations and conflicts of interest must be declared in the publication.  
559 Reports of research not in accordance with the principles of this Declaration should not be  
560 accepted for publication.

561 The PI of this study, recognizing the seminal importance of this investigation, is committed to  
562 the unrestricted and widespread dissemination of all primary and secondary endpoint results  
563 and tertiary analyses. At the conclusion of the study, a abstract reporting the primary results  
564 will be prepared by the Principal Investigators and presented at an annual scientific meeting  
565 (e.g., Transcatheter Cardiovascular Therapeutics, EuroPCR, the American Heart Association,  
566 the American College of Cardiology, or the European Society of Cardiology meeting). A  
567 publication will similarly be prepared for publication in a reputable scientific journal.

568 Following analysis and presentation of the primary endpoint results, active participation of all  
569 study group members, will be solicited for data analysis and abstract and manuscript  
570 preparation and therefore included as co-authors. Submission of all abstracts and publications  
571 regarding the primary endpoint and secondary endpoints from the study requires approval by  
572 the Principal Investigators after review by all members of the study group.

573

574

575

576

577 Mainz, 14.09.2020

578

Mainz, 14.09.2020
