# Supplementary material for: Coronary Venous Pressure and Microvascular Hemodynamics in Patients With Microvascular Angina: A Randomized Clinical Trial
Source: PubMed Central journal article supplement (PMC10448373; doi:10.1001/jamacardio.2023.2566), 2023-08-23
Supplement: jamacardiol-e232566-s003.pdf [file jamacardiol-e232566-s003.pdf]

## Data Sharing Statement

Ullrich H, Hammer P, Olschewski M, Münzel T, Escaned J, Gori T. Coronary venous pressure and microvascular hemodynamics in patients with microvascular angina: a randomized clinical trial. *JAMA Cardiol.* Published online August 23, 2023. doi:10.1001/jamacardio.2023.2566

**Data available:**

Yes

**Data types:**

Deidentified participant data

**How to access data:**

tommaso.gori@unimedizin-mainz.de

**When available:**

With publication

**Document types:**

None

**Who can access the data:**

Upon motivated legitimate request.

**Types of analyses:**

No a priori limitations

**Mechanisms of data availability:**

after approval of a proposal and upon signature of a DSA.

**Any additional restrictions:** None
